# 1 **Positive selection inhibits plasmid coexistence in bacterial genomes**

2 Laura Carrilero<sup>1</sup>, Anastasia Kottara<sup>2,3</sup>, David Guymer<sup>3</sup>, Ellie Harrison<sup>2</sup>, James P. J. Hall<sup>4</sup>,  
3 Michael A. Brockhurst<sup>1</sup>

4

5 1. Division of Evolution and Genomic Sciences, School of Biological Sciences, University of  
6 Manchester, Manchester, M13 9PT, UK.

7 2. Department of Animal and Plant Sciences, University of Sheffield, Sheffield, S10 2TN,  
8 UK.

9 3. Department of Biology, University of York, York, YO10 5DD, UK.

10 4. Department of Evolution, Ecology and Behaviour, Institute of Integrative Biology,  
11 University of Liverpool, Liverpool, L69 7BZ, UK.

12

## 13 **Abstract**

14 Plasmids play an important role in bacterial evolution by transferring niche adaptive  
15 functional genes between lineages, thus driving genomic diversification. Bacterial genomes  
16 commonly contain multiple, coexisting plasmid replicons (i.e., plasmid coinfection), which  
17 could fuel adaptation by increasing the range of gene functions available to selection and  
18 allowing their recombination. However, plasmid coinfection is difficult to explain because the  
19 acquisition of plasmids typically incurs high fitness costs for the host cell. Here, we show that  
20 plasmid coinfection was stably maintained without positive selection for plasmid-encoded  
21 gene functions and was associated with compensatory evolution to reduce fitness costs. By  
22 contrast, with positive selection, plasmid coinfection was unstable despite compensatory  
23 evolution. Positive selection discriminated between differential fitness benefits of functionally  
24 redundant plasmid replicons, retaining only the more beneficial plasmid. These data suggest  
25 that while the efficiency of negative selection against plasmid fitness costs declines over  
26 time due to compensatory evolution, positive selection to maximise plasmid-derived fitness

benefits remains efficient. Our findings help to explain the forces structuring bacterial genomes: Coexistence of multiple plasmids in a genome is likely to require either rare positive selection in nature or non-redundancy of accessory gene functions among coinfecting plasmids.

31

## 32 **Introduction**

Plasmids play an important role in the evolution of bacterial genomes, promoting evolutionary divergence by transferring niche-adaptive accessory gene functions between lineages[1-3]. Bioinformatic analyses suggest that carriage by single bacterial host cells of multiple, coexisting plasmid replicons—i.e. plasmid coinfection—is more commonly observed than would be expected by chance[4]. Accumulation of multiple, coexisting plasmid replicons thus drives genome expansion and can lead to the evolution of multipartite genomes [5-7]. Moreover, this process could potentially fuel evolutionary innovation through reassortment of new combinations of accessory functions and the formation of new mobile genetic elements through plasmid-plasmid recombination[8, 9]. Nevertheless, the observed high rates of plasmid coinfection are surprising given that plasmid acquisition usually disrupts normal cellular function and is often associated with large fitness costs for the host cell[10-14].

45

One explanation for abundant plasmid coinfection is that the fitness costs of acquiring multiple plasmids could be less than additive. Positive epistasis between plasmid costs could permit the accumulation of multiple plasmids by reducing the cost for plasmid-bearers of acquiring additional plasmids[4, 15, 16], however, positive epistatic interactions among plasmid costs are not universal[4]. Moreover, as we will show in this study, the methods by which positive epistasis has been previously estimated (i.e., competition of plasmid-carriers against plasmid-free cells[4]) may not measure the actual cost of plasmid coinfection. Compensatory evolution to ameliorate the cost of plasmids has been described in a wide

54 range of plasmid systems and prevents plasmid loss by weakening negative selection  
55 against the plasmid backbone over time[17-20]. If the fitness costs of multiple plasmids have  
56 common mechanistic causes, it is possible that the same compensatory mechanisms could  
57 simultaneously ameliorate the costs of multiple plasmids which may in turn then promote  
58 stable plasmid coinfection[15, 19]. The role of positive selection for beneficial plasmid-  
59 encoded accessory gene functions in plasmid coinfection is less well studied. Positive  
60 selection could promote plasmid coinfection if the fitness benefits of carrying multiple  
61 plasmids outweighed the accumulative fitness costs, or, alternatively, may inhibit coinfection  
62 by selecting for consolidation of beneficial functions onto fewer replicons, accompanied by  
63 the loss of redundant, costly plasmid backbone(s)[13, 14]. Understanding the roles of these  
64 various mechanisms in plasmid coinfection requires experimental tests, but while the fitness  
65 costs of single- and co-infection by plasmids have been estimated, studies tracking the  
66 longer-term dynamics of plasmid coinfection in bacterial populations are lacking.

67

68 Here, we consider the experimental coinfection dynamics for two distantly-related, naturally  
69 co-occurring conjugative mercury-resistance plasmids—pQBR103 and pQBR57—originally  
70 isolated from a field-site in the UK[21, 22]. Each of the plasmids individually causes a  
71 substantial fitness cost in the host bacterium *Pseudomonas fluorescens* SBW25[23]. Both  
72 plasmids encode a near identical copy of the *mer* mercury-resistance operon encoded on a  
73 Tn5042 transposon [23, 24], which allows plasmid-bearers to reduce toxic Hg(II) to Hg,  
74 providing a fitness benefit to plasmid-carriers at increased Hg(II) concentrations[23].  
75 Although SBW25(pQBR57) outcompetes SBW25(pQBR103) in the absence of mercury, this  
76 competitive hierarchy is reversed in mercury-containing environments[23]. This suggests  
77 that while pQBR57 imposes a lower fitness cost on SBW25, it also provides less of a fitness  
78 benefit in the presence of mercury, relative to pQBR103. Both plasmids are maintained in  
79 single-infected bacterial populations and, while this appears in each case to be linked to  
80 compensatory evolution [18, 25], unlike pQBR103, pQBR57 is capable of a high rate of

81 conjugative transfer, which contributes to its survival and spread particularly in the absence  
82 of mercury[26, 27]. Multiple mechanisms of compensatory evolution have previously been  
83 described for the pQBR plasmids. Specifically, chromosomal compensatory mutations that  
84 occur either in *gacA/gacS* encoding a two-component global regulatory system or in  
85 *PFLU4242* encoding a hypothetical protein with two domains of unknown function, reduce  
86 the cost of these and other pQBR plasmids individually[17, 18].

87

88 Replicate laboratory populations of SBW25 that were originally either singly-infected or  
89 coinfecting with the plasmids pQBR103 and pQBR57 were propagated by serial transfer with  
90 or without positive selection (i.e. addition of mercury (II) chloride) for approximately ~265  
91 bacterial generations. We tracked bacterial population densities and the dynamics of  
92 mercury resistance over time and used multiplex-PCR to determine the plasmid-carriage  
93 status of mercury resistant clones. We show that plasmid coinfection was stable in  
94 populations without positive selection, whereas positive selection drove the loss of pQBR57  
95 and the dominance of SBW25 carrying pQBR103-only. Loss of plasmid coinfection occurred  
96 despite compensatory evolution to ameliorate plasmid fitness costs and was caused by  
97 positive selection discriminating between the differential fitness benefits of the plasmids,  
98 retaining only the more beneficial plasmid.

99

## 100 **Material and Methods**

### 101 *Bacterial Strains and Culture Conditions*

102 Bacterial populations were grown in liquid Kings B (KB)[28] broth microcosms (6 ml of KB  
103 broth in a 30ml glass universal vial). These were incubated at 28° C and shaken at 180 rpm.  
104 To generate positive selection for mercury resistance, microcosms were supplemented with  
105 40 µM Hg (II) chloride, as required. Bacterial colonies were obtained by plating serial  
106 dilutions onto KB agar. To select particular bacterial strains (described below), agar plates  
107 were supplemented with gentamycin (30 µg/ml), streptomycin (250 µg/ml), Hg (II) chloride

(20  $\mu$ M for plating and 100  $\mu$ M for replica plating), kanamycin (25  $\mu$ g/ml) or X-gal (75  $\mu$ g/ml), as required.

Two isogenic *P. fluorescens* SBW25 strains[21] with chromosomal resistance markers [either gentamycin resistance ( $Gm^R$ ) or a streptomycin resistance with LacZ ( $Sm^R/lacZ$ )] were used to enable creation of transconjugants[23, 29, 30]. Derived *P. fluorescens* SBW25 deletion mutants for the *gacS* gene [SBW25- $Gm^R$ - $\Delta gacS$ ; [18]] or the *PFLU4242* gene [SBW25- $Gm^R$ - $\Delta PFLU4242$ ; [17]] were used to enable measurement of the effects of these genes on plasmid costs in competition experiments. An isogenic plasmid-free *P. fluorescens* SBW25  $Gm^R$  strain with a chromosomal Tn5042 mercury resistance transposon derived from the pQBR103 plasmid [SBW25(Tn5042)] was used to enable measurement of the fitness cost of the plasmid backbones in competition experiments[27].

Two mercury resistance plasmids were used in this study that had been previously isolated from agricultural soil in Oxfordshire, UK: pQBR57 [21] and pQBR103 [22]. An isogenic variant of pQBR103 marked with an mCherry fluorescent protein gene and a kanamycin resistance gene ( $mCherryKm^R$ ) was used to enable selection of coinfecting bacterial cells[31]. Plasmids were introduced to bacterial strains by conjugation using standard protocols[23, 32]. Briefly, transconjugants were selected by plating onto KB agar plates supplemented with 20  $\mu$ M Hg (II) chloride or 25  $\mu$ g/ml kanamycin and the relevant antibiotic [either gentamycin (30  $\mu$ g/ml) or streptomycin (250  $\mu$ g/ml)] as appropriate to select the recipient strain. Plasmid status of transconjugant colonies was determined by PCR, as previously described[18, 26].

### *Selection experiment*

Six replicate populations each of SBW25- $Sm^R/lacZ$ (pQBR57+pQBR103- $Km^R$ ), SBW25- $Sm^R/lacZ$ (pQBR57), SBW25- $Sm^R/lacZ$ (pQBR103- $Km^R$ ) were propagated with or without

positive selection (i.e., supplementation with 40  $\mu$ M Hg (II) chloride or 0  $\mu$ M Hg (II) chloride, respectively), and six replicate populations of the SBW25-Sm<sup>R</sup>/*lacZ* plasmid-free control were propagated without Hg (II) chloride. (Note: plasmid-free populations cannot survive in 40  $\mu$ M Hg (II) chloride.) Each replicate was founded by 60  $\mu$ l of an overnight liquid culture initiated from a single independent colony previously streaked on KB agar. One percent of each population was serially transferred to fresh media every 48h for 40 transfers, resulting in approximately 265 bacterial generations. Every 10 transfers serial dilutions of each population were plated onto KB agar and incubated at 28° C to enumerate bacterial densities. These plates were replica plated onto KB agar supplemented with Hg (II) chloride 100  $\mu$ M/ml to determine the frequency of mercury resistance (Hg<sup>R</sup>). Twenty-four mercury resistant colonies per population per time-point were chosen at random to determine the presence of each plasmid and Tn5042 by multiplex PCR. We used three set of primers to target the Mer-Tn5042 transposon [F-TGCAAGACACCCCCTATTGGAC, R-TTCGGCGACCAGCTTGATGAAC], the pQBR103-plasmid specific origin of replication *oriV* [F- TGCCTAATCGTGTGTAATGTC, R-ACTCTGGCCTGCAAGTTTC] and the pQBR57-plasmid specific *uvrD* gene [F-CTTCGAAGCACACCTGATG, R-TGAAGGTATTGGCTGAAAGG] [18, 26]. Briefly, a mixture of 1x GoTaq Green (Promega, WI USA) with 0.71  $\mu$ M of each primer to detect pQBR103, 0.89  $\mu$ M of each primer to detect pQBR57 and 0.36  $\mu$ M of each primer to detect Tn5042 was used with the following thermocycle program: 95 °C 5', 30 x (95 °C 30', 58 °C 30', 72 °C 1'), 72 °C 5' [26].

### Competition experiments

Competition experiments were used to measure the fitness costs associated with carrying plasmid(s) against a range of competitor strains. In all cases, overnight cultures of competitors were mixed in a 1:1 ratio and diluted 100-fold into KB microcosms  $\pm$  40  $\mu$ M Hg (II) chloride and incubated for 48h at 28°C with shaking at 180rpm. Starting and final densities of each marked strain were determined by plating onto KB agar supplemented with X-gal, and relative fitness (*w*) was calculated as previously described[18].

163

164 To measure the fitness cost of the plasmid backbones per se, that is once the fitness effect  
165 of the Tn5042 is accounted for, the plasmid-bearing strains [SBW25-Sm<sup>R</sup>/lacZ(pQBR103-  
166 Km<sup>R</sup>) or SBW25-Sm<sup>R</sup>/lacZ(pQBR57) or SBW25-Sm<sup>R</sup>/lacZ(pQBR57+pQBR103-Km<sup>R</sup>)] were  
167 competed against SBW25-Gm<sup>R</sup>(Tn5042) both with and without Hg (II) chloride. Six  
168 replicates were performed per comparison.

169

170 To measure the fitness cost of plasmid coinfection we competed SBW25-  
171 Sm<sup>R</sup>/lacZ(pQBR57+pQBR103-Km<sup>R</sup>) against either SBW25-Gm<sup>R</sup>(pQBR103-Km<sup>R</sup>) or SBW25-  
172 Gm<sup>R</sup> (pQBR57) or SBW25-Gm<sup>R</sup>(pQBR57+pQBR103-Km<sup>R</sup>) as a control, both with and  
173 without Hg (II) chloride. Twelve replicates were performed per comparison. Normalised  
174 fitness was calculated by subtracting the mean of the control competition [i.e., SBW25-  
175 Sm<sup>R</sup>LacZ(pQBR57+pQBR103-Km<sup>R</sup>) versus SBW25-Gm<sup>R</sup>(pQBR57+pQBR103-Km<sup>R</sup>)].

176

177 To measure the fitness effect of putative compensatory mutations on plasmid carriage we  
178 competed SBW25-Gm<sup>R</sup> or SBW25-Gm<sup>R</sup>-ΔgacS or SBW25-Gm<sup>R</sup>-ΔPFLU4242 carrying  
179 plasmid(s) (pQBR57 or pQBR103-Km<sup>R</sup> or pQBR57+pQBR103-Km<sup>R</sup>) against plasmid-free  
180 SBW25-Sm<sup>R</sup>/lacZ. Six replicates were performed per comparison.

181

## 182 *Genomic analysis*

183 The whole genome sequence for at least one randomly chosen clone per population was  
184 obtained at the end of the selection experiment. For populations containing multiple mercury  
185 resistant genotype subpopulations—i.e., clones without mercury resistance or Tn5042-only  
186 or pQBR103-only or pQBR57-only or both pQBR57+pQBR103—and where these  
187 genotype(s) comprised at least 10% of the population, we obtained the whole genome  
188 sequence for one randomly chosen clone per subpopulation. Whole-genome sequencing  
189 was performed by MicrobesNG using a 250bp paired-end protocol on the Illumina HiSeq  
190 platform. Paired reads were aligned to the annotated ancestral genome sequence using

Burrows-Wheeler Aligner[33] and duplicate reads were removed using picard (<https://broadinstitute.github.io/picard/>). Variants were called using GATK Haplotype Caller[34] and annotated using SnpEff[35]. Called variants were then filtered to remove low quality calls with either low coverage (< 12 reads per bp), low quality (scores <200) or low frequency of the alternative allele (< 90% of reads with alternative). In addition, as a complementary and confirmatory approach, variants were also called against the ancestral reference genome using the Breseq computational pipeline using the standard default settings [36]. All variants not called by both methods were validated visually using the alignment viewer IGV[37, 38]. All sequencing data are available on the Short Read Archive under accessions PRJEB38218 / ERP121615.

## *Statistical analysis*

The integral of mercury resistance frequency over time was calculated as the area under the curve using the AUC function of the 'flux' package in R and compared between treatments using Welch's ANOVA due to unequal variances. Posthoc pairwise comparisons were performed using the Dunnetts T3 test. The integral of plasmid coinfection frequency over time was calculated as the area under the curve using the AUC function of the 'flux' package in R and compared between treatments using a Mann Whitney U test due to unequal variances. Relative fitness data from competition experiments was analysed using ANOVA and posthoc pairwise comparisons were performed using Tukey tests. Analyses were performed in R 3.6.1 [39] or Prism v8.1.2.

## **Results**

### *Temporal dynamics of mercury resistance and plasmid carriage*

To study the effect of positive selection on the dynamics of plasmid coinfection we propagated replicate populations of SBW25 carrying either both plasmids or pQBR103-alone or pQBR57-alone, both with and without selective levels of Hg(II) chloride by serial transfer for approximately 265 bacterial generations. We also propagated replicate plasmid-free



control SBW25 populations without Hg(II) chloride. Mercury resistance ( $Hg^R$ ) was maintained near fixation under positive selection for all plasmid treatments, but without positive selection its frequency varied according to plasmid treatment (Figure S1; comparison of cumulative  $Hg^R$  frequency between plasmid treatments without Hg(II) selection: Welch's ANOVA;  $W_{2,6.685} = 18.32$ ,  $P = 0.0019$ ). Without positive selection, whereas  $Hg^R$  remained at high frequency in the both-plasmids treatment,  $Hg^R$  declined in the single-plasmid treatments, and significantly so in the pQBR103-alone treatment (Dunnett's T3 test for pairwise comparisons of plasmid treatments without Hg(II) selection: pQBR103:both  $P = 0.0044$ ; pQBR57:both  $P = 0.4038$ ; pQBR103:pQBR57 only  $P = 0.3157$ ). The  $Hg^R$  phenotype indicates the presence of the Tn5042-encoded *mer* operon within the cell, which could be explained by the maintenance of one or both plasmids or by the relocation of the Tn5042 to the chromosome accompanied by plasmid loss[18, 26, 30]. We therefore used multiplex-PCR to determine the presence of the Tn5042 and of each plasmid. In the single-plasmid treatments, whereas plasmid-encoded  $Hg^R$  predominated in populations propagated without positive selection, we observed the invasion of plasmid-free cells carrying a chromosomal Tn5042 in some replicates with positive selection (Figure 1; Figure S2; 2 / 6 replicates of the pQBR57-alone treatment; 1 / 6 replicates of the pQBR103-alone treatment). Plasmid dynamics also varied with positive selection in the both-plasmids treatments. Plasmid coinfection was maintained at higher frequency in populations without positive selection compared to those propagated with positive selection (Figure 1; comparison of cumulative coinfection frequency: Mann Whitney U test,  $U = 0$ ,  $P = 0.0022$ ). This was driven by the loss of pQBR57 from initially coinfecting cells under positive selection, such that plasmid-coinfecting cells were replaced by cells carrying pQBR103-only in 4 out of 6 replicates (Figure S2). Taken together, these data suggest that positive selection inhibited plasmid coinfection and, furthermore, that the pQBR57-backbone was selected against more strongly than the pQBR103-backbone under positive selection for mercury resistance.

#### *Fitness effects of plasmid carriage*

To understand the effect of positive selection on the relative fitness of the various Hg<sup>R</sup> genotypes observed here—i.e., chromosomal Tn5042, either plasmid alone or both plasmids together—we performed a series of competition experiments. First, we tested how positive selection affected the cost of carrying the plasmid backbone(s) by competing SBW25 plasmid-bearers against an isogenic ancestral SBW25 encoding a chromosomal copy of the Tn5042 [SBW25(Tn5042)]. Here, in each pairwise competition both competitors are resistant to mercury, but the plasmid bearers must pay the additional fitness costs of maintaining the plasmid backbone(s). Plasmids bearers varied in fitness relative to SBW25(Tn5042) according to their plasmid complement: pQBR103 had a higher fitness cost than either pQBR57 or both plasmids together (Figure 2; ANOVA; plasmid main effect,  $F_{2,28} = 7.813$   $P = 0.002$ ; Tukey pairwise contrasts: pQBR103:pQBR57  $P = 0.0217$ ; pQBR103:both  $P = 0.0019$ ; pQBR57:both  $P = 0.6399$ ). Moreover, the addition of Hg(II) chloride increased the fitness cost of plasmid carriage (mercury main effect,  $F_{1,28} = 31.298$   $P = 5.48 \times 10^{-6}$ ), suggesting that once the benefit of mercury resistance is negated, Hg(II) chloride increased the costs of the plasmid backbones *per se*. Together, these data confirm previous studies reporting a higher cost of the pQBR103 backbone relative to the pQBR57 backbone[23] and, moreover, explain the loss of redundant plasmid replicons under positive selection seen here and in other studies[26, 31].

Nevertheless, these data cannot explain the preferential loss of the pQBR57 backbone from coinfecting cells that we observed. To further explore this, we next directly competed SBW25 coinfecting with both plasmids against SBW25 carrying either of the plasmids alone, both with and without positive selection. We found that the relative fitness of coinfecting SBW25 was lower when competed against SBW25(pQBR103) than against SBW25(pQBR57) (Figure 3; ANOVA; plasmid main effect,  $F_{1,40} = 7.438$   $P = 0.009435$ ) and was reduced by the presence of Hg(II) in the media (mercury main effect,  $F_{1,40} = 5.727$   $P = 0.02149$ ) while the interaction of these factors was marginally non-significant (plasmid:mercury interaction,  $F_{1,40} = 3.616$   $P = 0.06443$ ). Post-hoc pairwise comparisons were consistent with positive selection

favouring the loss of pQBR57 from coinfecting cells as we observed in our serial transfer experiment: The addition of Hg(II) chloride further reduced the fitness of coinfecting SBW25(pQBR57+pQBR103) when competed against SBW25(pQBR103) (Tukey pairwise comparison; with versus without Hg(II) chloride,  $P = 0.0203$ ) but not when competed against SBW25(pQBR57) (Tukey pairwise comparison; with versus without Hg(II) chloride,  $P = 0.9967$ ), such that the fitness of coinfecting cells was higher against SBW25(pQBR57) than against SBW25(pQBR103) in the presence of Hg(II) chloride (Tukey pairwise comparison;  $P = 0.0113$ ). Taken together and considering previous findings [23], these data suggest that although the pQBR103 backbone is costlier than the pQBR57 backbone, pQBR103 is more beneficial in mercury-containing environments than pQBR57. Thus, the preferential loss of pQBR57 from coinfecting cells under positive selection is better explained by selection favouring the more beneficial plasmid rather than selection against the more costly plasmid backbone.

### *Compensatory mutations and their fitness effects*

A potential alternative explanation for the contrasting patterns of plasmid maintenance among treatments would be if there existed differences in the propensity for compensatory evolution to occur according to plasmid content or positive selection. To test this, we obtained the whole genome sequences of one randomly chosen evolved clone per Hg<sup>R</sup> genotype present at greater than 10% frequency per population at the end of the serial transfer experiment. There was no evidence for differential compensatory evolution according to treatment: all sequenced plasmid-bearing evolved clones carried a mutation in a known compensatory locus. Specifically, we observed mutations in *gacA*, *gacS* or *PFLU4242*, or in regions immediately upstream of compensatory loci (Figure 4; data for all sequenced clones provided in Figure S3-S9). By contrast, mutations at these loci were never observed in evolved clones from the plasmid-free control populations. To confirm that loss of either *gacS* or *PFLU4242* was sufficient to ameliorate the cost of plasmid co-infection, we compared the effect of compensatory mutations on the fitness of plasmid

bearers carrying either one or both plasmids relative to the plasmid-free ancestor using competition experiments. Consistent with a role for these genes in compensatory evolution, deletion of either *gacS* or *PFLU4242* reduced the fitness cost of carrying plasmids (Figure 5). However, while deletion of either gene completely ameliorated the cost of carrying either both plasmids or pQBR103 alone, only deletion of *PFLU4242* completely ameliorated the cost of carrying pQBR57 alone, whereas deletion of *gacS* offered only partial amelioration (ANOVA; strain by plasmid interaction,  $F_{4, 39} = 2.628$ ,  $P = 0.049$ ). Thus, compensatory evolution occurred in all treatments and was effective at ameliorating the additional cost of carrying multiple plasmids. While this may explain the stability of plasmid coinfection without positive selection, it cannot explain the decline in coinfection due to loss of pQBR57 with positive selection, which instead appears to have been driven by the differential benefits of the plasmids in the presence of Hg(II) chloride.

## Discussion

Plasmid coinfection is more commonly observed in bacterial genomes than is expected by chance[4] which is surprising given the high fitness costs usually associated with plasmid acquisition[1, 2, 11, 13]. Here, we show that coinfection by plasmids encoding the same functional trait, namely mercury resistance, was inhibited by positive selection for this trait. With positive selection, coinfection declined due to loss of pQBR57 from originally coinfecting cells, whereas without positive selection, plasmid coinfection was stably maintained. This difference could not be explained by the fitness costs of plasmid carriage, firstly because coinfection was maintained in environments where the net cost of plasmid carriage was highest (i.e. without Hg (II) chloride), and secondly because compensatory mutations to ameliorate these costs occurred across all treatments. Instead, the loss of pQBR57 from originally coinfecting cells under positive selection could be explained by the differential fitness benefits provided by the two plasmids in the presence of Hg (II) chloride. Addition of Hg (II) chloride reduced the fitness of coinfecting cells when competing against pQBR103-carriers but not when competing against pQBR57-carriers. Consistent with previous data

from singly-infected cells[23], we show that this occurs because although the pQBR103 backbone is costlier, it provides a greater benefit in the presence of Hg (II) chloride. Thus, where multiple plasmids encode the same functional trait, under positive selection this redundancy can drive loss of the less beneficial plasmid.

Loss of a redundant plasmid replicon by coinfecting cells under positive selection is conceptually similar to the replacement of single-infected plasmid bearers by the chromosomal Tn5042, which was also only observed under positive selection. In both cases, redundancy allows for loss of one of the replicons encoding resistance. It may be the case that if our experiment was run for even longer, the initially coinfecting populations would also eventually consist only of cells with a chromosomal Tn5042. Indeed, our relative fitness data show that SBW25(Tn5042) outcompeted both single- and double-infected plasmid bearers in mercury-containing environments. This outcome may have been delayed (or prevented) because the loss of both plasmids by segregation is likely to occur with low probability and/or because the fitness difference between chromosomal and plasmid-encoded mercury resistance was reduced by compensatory evolution. The key difference between environments with versus without positive selection, is that, in the former, both the benefit and the cost of the plasmids contribute to their fitness effect, whereas in the latter only their costs do. This appears to increase the fitness difference between coinfecting cells and those carrying only the more beneficial plasmid. Selection for plasmid benefits may therefore be more efficient than negative selection against plasmid costs, which becomes less efficient over time due to compensatory evolution to ameliorate the plasmid fitness cost.

Previous studies suggest that the positive epistasis of plasmid fitness costs enables plasmid coinfection[4]. Our data provide contradictory evidence both for and against this idea. When competing against a plasmid-free genotype [SBW25(Tn5042)], SBW25 coinfecting with both plasmids showed a lower fitness cost than expected from the individual fitness costs of each plasmid alone. This is consistent with positive epistasis. However, when coinfecting SBW25

was directly competed against SBW25 singly-infected with either of the plasmids, we measured an appreciable additional cost of plasmid coinfection. This is not consistent with positive epistasis. It seems likely that direct competition of coinfecting versus singly-infected cells offers the most accurate method to measure the fitness effect of carrying a second plasmid replicon. Whereas, competing singly-infected and coinfecting cells separately against a plasmid-free competitor seems likely to underestimate the actual cost of carrying a second plasmid. Importantly, the study by San Millan and colleagues (2014) used a set-up similar to our first set of experiments, namely separate competition against a common plasmid-free strain[4], a method that our data suggest is likely to underestimate the actual fitness cost of coinfection. Our data when taken together do not, therefore, support a role for positive epistasis in explaining plasmid coinfection and urge caution when interpreting epistasis from relative fitness data obtained against plasmid-free competitors.

At present, it is unclear why the two plasmids differ in the benefit they provide to SBW25 under mercury positive selection. Both plasmids possess one copy of the Tn5042 transposon encoding the Mer operon, which provides mercury resistance. These Tn5042 sequences are identical except for a single base pair difference in *merR*, a repressor controlling expression of the Mer operon[23]. Low concentrations of Hg(II) are bound by MerR, causing a conformational change of the protein which relieves repression, allowing expression of the Mer operon, which imports Hg(II) into the cell and reduces it to Hg<sup>0</sup>[40, 41]. It is possible that the single base pair difference in the *merR* sequence between the pQBR103 and pQBR57 copies of the Tn5042 could change the sensitivity of the MerR repressor leading to altered expression of the Mer operon. For example, by detoxifying the environment through reduction of Hg(II) to Hg<sup>0</sup>, mercury resistance benefits all neighbouring cells [42], thus a reduced affinity for Hg(II) could accrue fitness benefits when in competition with strains encoding MerR with a higher affinity and thus earlier expression of the Mer operon. Alternatively, the plasmids differ extensively in their gene content, and it is possible that epistatic interactions between these variable genes and the Mer operon could underlie

the observed differential fitness benefits. Resolving this is beyond the scope of this paper but identifying the causes of differences in plasmid benefit will be a focus of future work.

We observed mutations in three loci previously associated with compensatory evolution for pQBR plasmids. Specifically, mutations to either of the genes encoding the GacAS two-component global regulatory system[17, 18], or the gene *PFLU4242* of unknown function[17], were sufficient to ameliorate the fitness costs associated with coinfection by both pQBR103 and pQBR57. Similarly, deletion of either locus could completely ameliorate the cost of pQBR103, whereas amelioration of pQBR57 was more complete via deletion of *PFLU4242* than *gacS*. Together this suggests that these plasmids, despite being genetically divergent, cause their associated fitness costs through a similar (or a shared) mechanism. Shared targets of compensatory evolution among divergent plasmids have been reported in other plasmid-host systems[15, 19], for example compensatory mutations in chromosomal helicases[19]. Consistent with previous work on other host-plasmid systems[15, 19], our findings suggest that compensatory evolution could indeed promote plasmid coinfection by reducing the cost of multiple plasmids simultaneously. This has the effect of reducing the efficiency of negative selection against plasmid costs over time. It is notable, however, that although compensatory evolution ameliorating the fitness costs of plasmid coinfection occurred in both the mercury-containing and mercury-free environments, plasmid coinfection was only stable in the mercury-free environment (at least for the duration of this study). This occurs because positive selection remains efficient even after compensatory evolution occurs, allowing discrimination of differential fitness benefits among functionally redundant plasmid replicons.

These data reveal that coinfecting plasmids are unlikely to be maintained under positive selection if they encode redundant functions and there are differences in the fitness benefits these accessory genes provide. Moreover, while compensatory evolution can promote plasmid coinfection in the absence of positive selection, it does not do so in the presence of



positive selection where not only the cost but also the benefit of the plasmid is subject to selection. These findings suggest therefore that widespread plasmid coinfection is likely to be explained either by positive selection for accessory gene functions being rare in nature, or by coinfecting plasmids encoding non-redundant accessory gene functions. These findings have implications for understanding the forces structuring bacterial genomes[1, 5-7], and suggest a process whereby recurrent phases of genome expansion and contraction are driven by variable positive selection: Multiple redundant replicons can be acquired, and their costs ameliorated by compensatory evolution thus allowing genome expansion between bouts of periodic positive selection, which, when they subsequently occur, then select reduced genomes containing only the highest benefit replicon(s).

## Acknowledgements

This work was funded by grants from the European Research Council (ERC Starting Grant agreement 311490), the Natural Environment Research Council (NE/R008825/1), the Biotechnology and Biological Sciences Research Council (BB/R006253/1), and the Leverhulme Trust (PLP-2014-242) to MAB. EH is funded by an Independent Research Fellowship from the Natural Environment Research Council. JPJH is funded by a Tenure Track Fellowship from the University of Liverpool.

## Competing Interests Statement

The authors declare no competing interests.

## References

1. Brockhurst, M.A., et al., *The Ecology and Evolution of Pangenomes*. Curr Biol, 2019. **29**(20): p. R1094-R1103.



- 441 2. Hall, J.P.J., M.A. Brockhurst, and E. Harrison, *Sampling the mobile gene pool:*  
442 *innovation via horizontal gene transfer in bacteria.* Philos Trans R Soc Lond B Biol  
443 Sci, 2017. **372**(1735): p. 20160424.
- 444 3. Norman, A., L.H. Hansen, and S.J. Sørensen, *Conjugative plasmids: Vessels of the*  
445 *communal gene pool.* Philos Trans R Soc Lond B Biol Sci . 2009. **364**(1527): p.  
446 2275-2289.
- 447 4. San Millan, A., K. Heilbron, and R.C. MacLean, *Positive epistasis between co-*  
448 *infecting plasmids promotes plasmid survival in bacterial populations.* ISME J, 2014.  
449 **8**(3): p. 601-612.
- 450 5. Touchon, M. and E.P. Rocha, *Coevolution of the Organization and Structure of*  
451 *Prokaryotic Genomes.* Cold Spring Harb Perspect Biol, 2016. **8**(1): p. a018168.
- 452 6. Sela, I., Y.I. Wolf, and E.V. Koonin, *Theory of prokaryotic genome evolution.* Proc  
453 Natl Acad Sci U S A, 2016. **113**(41): p. 11399-11407.
- 454 7. diCenzo, G.C. and T.M. Finan, *The Divided Bacterial Genome: Structure, Function,*  
455 *and Evolution.* Microbiol Mol Biol Rev, 2017. **81**(3).
- 456 8. Jacoby, G.A., et al., *Transposition of Pseudomonas toluene-degrading genes and*  
457 *expression in Escherichia coli.* Nature, 1978. **274**(5667): p. 179-80.
- 458 9. Zheng, J., et al., *Evolution and dynamics of megaplasms with genome sizes larger*  
459 *than 100 kb in the Bacillus cereus group.* BMC Evol Biol, 2013. **13**: p. 262.
- 460 10. Hall, J.P.J., et al., *Positive selection inhibits gene mobilization and transfer in soil*  
461 *bacterial communities.* Nature Ecology and Evolution, 2017. **1**(9): p. 1348-1353.
- 462 11. San Millan, A. and R.C. MacLean, *Fitness Costs of Plasmids: a Limit to Plasmid*  
463 *Transmission.* Microbiology spectrum, 2017. **5**(5).
- 464 12. Baltrus, D.A., *Exploring the costs of horizontal gene transfer.* Trends Ecol Evol, 2013.  
465 **28**(8): p. 489-95.
- 466 13. Harrison, E. and M.A. Brockhurst, *Plasmid-mediated horizontal gene transfer is a*  
467 *coevolutionary process.* Trends Microbiol, 2012. **20**(6): p. 262-7.

- 468 14. Bergstrom, C.T., M. Lipsitch, and B.R. Levin, *Natural selection, infectious transfer*  
469 *and the existence conditions for bacterial plasmids*. Genetics, 2000. **155**(4): p. 1505-  
470 1519.
- 471 15. Santos-Lopez, A., et al., *Compensatory evolution facilitates the acquisition of multiple*  
472 *plasmids in bacteria*. doi.org, 2017: p. 187070-187070.
- 473 16. Gama, J.A., R. Zilhão, and F. Dionisio, *Plasmid Interactions Can Improve Plasmid*  
474 *Persistence in Bacterial Populations*. Frontiers in Microbiology, 2020. **11**: p. 2033.
- 475 17. Hall, J.P.J., et al., *Extremely fast amelioration of plasmid fitness costs by multiple*  
476 *functionally diverse pathways*. Microbiology (Reading, England), 2020. **166**(1): p. 56-  
477 62.
- 478 18. Harrison, E., et al., *Parallel Compensatory Evolution Stabilizes Plasmids across the*  
479 *Parasitism-Mutualism Continuum*. Current Biology, 2015. **25**(15): p. 2034-2039.
- 480 19. Loftie-Eaton, W., et al., *Compensatory mutations improve general permissiveness to*  
481 *antibiotic resistance plasmids*. Nature Ecology and Evolution, 2017. **1**(9): p. 1354-  
482 1363.
- 483 20. Millan, A.S., et al., *Interactions between horizontally acquired genes create a fitness*  
484 *cost in Pseudomonas aeruginosa*. Nature Communications, 2015. **6**.
- 485 21. Lilley, A.K., et al., *Diversity of mercury resistance plasmids obtained by exogenous*  
486 *isolation from the bacteria of sugar beet in three successive years*. FEMS  
487 Microbiology Ecology, 1996. **20**(4): p. 211-227.
- 488 22. Lilley, A.K. and M.J. Bailey, *The acquisition of indigenous plasmids by a genetically*  
489 *marked pseudomonad population colonizing the sugar beet phytosphere is related to*  
490 *local environmental conditions*. Applied and environmental microbiology, 1997. **63**(4):  
491 p. 1577-83.
- 492 23. Hall, J.P.J., et al., *Environmentally co-occurring mercury resistance plasmids are*  
493 *genetically and phenotypically diverse and confer variable context-dependent fitness*  
494 *effects*. Environmental Microbiology, 2015. **17**(12): p. 5008-5022.

- 495 24. Tett, A., et al., *Sequence-based analysis of pQBR103; A representative of a unique,*  
496 *transfer-proficient mega plasmid resident in the microbial community of sugar beet.*  
497 ISME Journal, 2007. **1**(4): p. 331-340.
- 498 25. Hall, J.P.J., E. Harrison, and M.A. Brockhurst, *Competitive species interactions*  
499 *constrain abiotic adaptation in a bacterial soil community.* Evolution Letters, 2018.  
500 **2**(6): p. 580-589.
- 501 26. Hall, J.P.J., et al., *Source-sink plasmid transfer dynamics maintain gene mobility in*  
502 *soil bacterial communities.* Proceedings of the National Academy of Sciences of the  
503 United States of America, 2016. **113**(29): p. 8260-8265.
- 504 27. Stevenson, C., et al., *Gene mobility promotes the spread of resistance in bacterial*  
505 *populations.* ISME Journal, 2017. **11**(8): p. 1930-1932.
- 506 28. King, E.O., M.K. Ward, and D.E. Raney, *Two simple media for the demonstration of*  
507 *pyocyanin and fluorescin.* The Journal of Laboratory and Clinical Medicine, 1954.  
508 **44**(2): p. 301-307.
- 509 29. Lambertsen, L., C. Sternberg, and S. Molin, *Mini-Tn7 transposons for site-specific*  
510 *tagging of bacteria with fluorescent proteins.* Environmental Microbiology, 2004. **6**(7):  
511 p. 726-732.
- 512 30. Kottara, A., et al., *Variable plasmid fitness effects and mobile genetic element*  
513 *dynamics across Pseudomonas species.* FEMS Microbiol Ecol, 2018. **94**(1).
- 514 31. Kottara, A., *Resolving the plasmid paradox: costs and benefits of horizontal gene*  
515 *transfer in a community context.* 2018.
- 516 32. Simonsen, L., et al., *Estimating the rate of plasmid transfer: An end-point method.*  
517 Journal of General Microbiology, 1990. **136**(11): p. 2319-2325.
- 518 33. Li, H. and R. Durbin, *Fast and accurate short read alignment with Burrows-Wheeler*  
519 *transform.* Bioinformatics, 2009. **25**(14): p. 1754-60.
- 520 34. McKenna, A., et al., *The Genome Analysis Toolkit: a MapReduce framework for*  
521 *analyzing next-generation DNA sequencing data.* Genome Res, 2010. **20**(9): p.  
522 1297-303.

35. Cingolani, P., et al., *A program for annotating and predicting the effects of single nucleotide polymorphisms, SnpEff: SNPs in the genome of Drosophila melanogaster strain w1118; iso-2; iso-3*. Fly (Austin), 2012. **6**(2): p. 80-92.
36. Deatherage, D.E. and J.E. Barrick, *Identification of mutations in laboratory-evolved microbes from next-generation sequencing data using breseq*. Methods Mol Biol, 2014. **1151**: p. 165-88.
37. Thorvaldsdóttir, H., J.T. Robinson, and J.P. Mesirov, *Integrative Genomics Viewer (IGV): high-performance genomics data visualization and exploration*. Brief Bioinform, 2013. **14**(2): p. 178-92.
38. Robinson, J.T., et al., *Integrative genomics viewer*. Nat Biotechnol, 2011. **29**(1): p. 24-6.
39. R Core Team, *R: A language and environment for Statistical computing*. 2013, R Foundation for Statistical Computing, Vienna, Austria, URL <http://www.R-project.org/>.
40. Osborn, A.M., et al., *Distribution, diversity and evolution of the bacterial mercury resistance (mer) operon*. FEMS Microbiol Rev, 1997. **19**(4): p. 239-62.
41. O'Halloran, T. and C. Walsh, *Metalloregulatory DNA-binding protein encoded by the merR gene: isolation and characterization*. Science, 1987. **235**(4785): p. 211-4.
42. Ellis, R.J., et al., *Frequency-dependent advantages of plasmid carriage by Pseudomonas in homogeneous and spatially structured environments*. ISME Journal, 2007. **1**(1): p. 92-95.

## Figure Legends

**Figure 1 | Population and mercury resistance genotype dynamics over time.** Plots are faceted by treatment, horizontally by mercury treatment (0  $\mu$ M or 40  $\mu$ M Hg (II) chloride) and vertically by plasmid treatment (pQBR103-alone or pQBR57-alone or both pQBR103+pQBR57). Solid black lines show the mean ( $n = 6$ )  $\pm$  standard error (grey shaded area) bacterial population density estimated from colony counts. Coloured dotted lines show the mean  $\pm$  standard error (correspondingly coloured shaded area) population density of pQBR103-only carriers (red), pQBR57-only carriers (blue), coinfecting pQBR103+pQBR57-carriers (purple), and chromosomal Tn5042 carrying plasmid-free cells (gold) inferred from their genotype frequencies. Plots for the population and genotype dynamics of individual replicates are shown in Figure S2. Raw data is provided in DataS1.

**Figure 2 | The fitness of plasmid carriers relative to SBW25(Tn5042) competed with or without Hg (II) chloride.** Black symbols show mean  $\pm$  standard error relative fitness of SBW25(pQBR103) (circles), SBW25(pQBR57) (triangles) or SBW25(pQBR103+pQBR57) (squares) against SBW25(Tn5042). Grey symbols in corresponding shapes show the individual replicate values ( $n = 5$  or  $6$ ). Points are jittered to prevent over-plotting. All competition assays were six-fold replicated except for SBW25(pQBR103) versus SBW25(Tn5042) in 0  $\mu$ M Hg (II) chloride and SBW25(pQBR57) versus SBW25(Tn5042) in 0  $\mu$ M Hg (II) chloride, where one replicate each was lost due to contamination. Raw data is provided in DataS1.

**Figure 3 | The fitness of coinfecting plasmid carriers against singly-infected plasmid carriers competed with or without Hg (II) chloride.** Black symbols show mean  $\pm$  standard error normalised relative fitness of SBW25(pQBR103+pQBR57) against SBW25(pQBR103) (circles) or SBW25(pQBR57) (triangles). Grey symbols in corresponding shapes show the individual replicate values ( $n = 10$  or  $12$ ). Points are jittered to prevent over-plotting. Competition assays against SBW25(pQBR103) were twelve-fold replicated, whereas

competition assays against SBW25(pQBR57) were ten-fold replicated due to the loss of replicates to contamination. Raw data is provided in DataS1.

**Figure 4 | Parallel evolution plot summarising the mutations arising in evolved clones per treatment.** Rings represent the SBW25 chromosome plotted separately for each treatment as indicated by the colour of the ring (see legend). Dots indicate genetic loci where mutations (excluding hypermutator clones) were observed in that treatment; the size of the dot corresponds to the number of replicate populations where a mutation at that locus occurred per treatment. Loci previously associated with compensatory mutations are highlighted in bold. In populations where more than one plasmid-bearing clone was sequenced, only mutations present in the dominant genotype are shown here. Hypermutator clones are not shown to avoid over-plotting. Plots for all sequenced clones are provided in Figure S3. The full table of called sequence variants is provided in DataS2.

**Figure 5 | Compensatory mutations ameliorate the fitness costs of plasmid carriage.** Plots are faceted horizontally by the plasmid status of the plasmid-carrying competitor. Open symbols show the mean ( $n = 6$ )  $\pm$  standard error of fitness for plasmid carrying genotypes relative to plasmid-free SBW25. Coloured filled dots denote individual replicate values for SBW25 (maroon), SBW25- $\Delta$ gacS (green) or SBW25- $\Delta$ PFLU4242 (orange) genotypes. Outliers (grey) were excluded from the statistical analysis. Raw data is provided in DataS1.

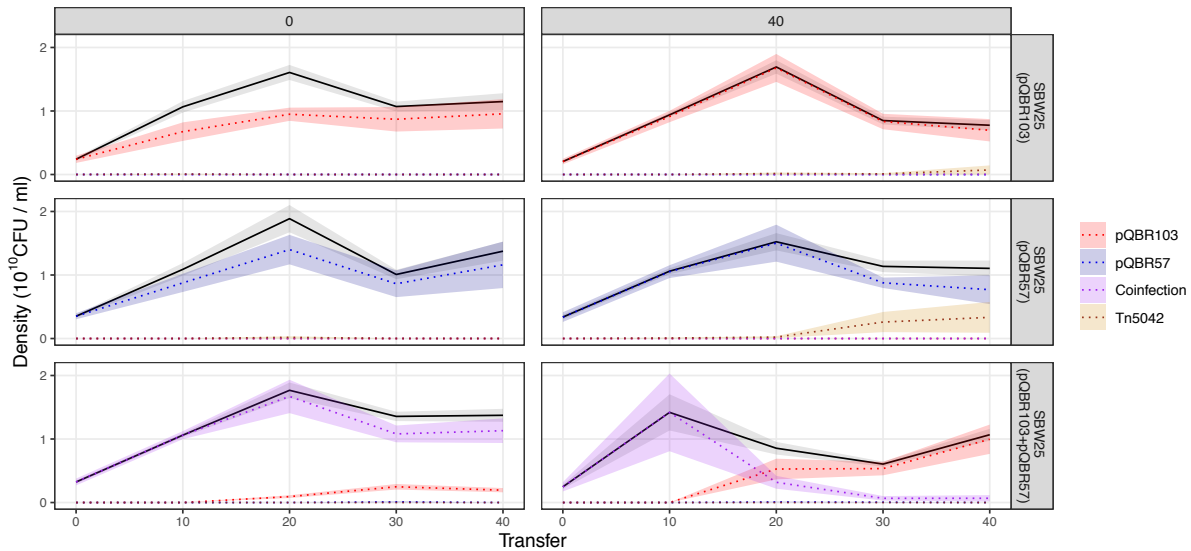

Relative fitness of plasmid carriers

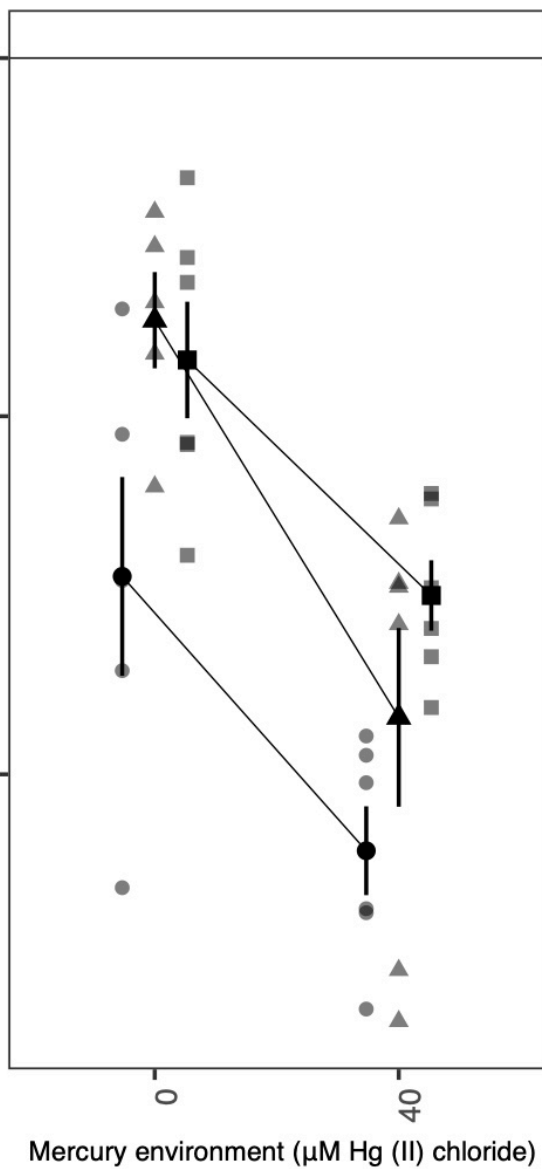



Normalised relative fitness of SBW25(pQBR57+pQBR103)

0.0  
-0.1  
-0.2  
-0.3  
-0.4

0

40

Mercury environment ( $\mu\text{M}$  Hg (II) chloride)

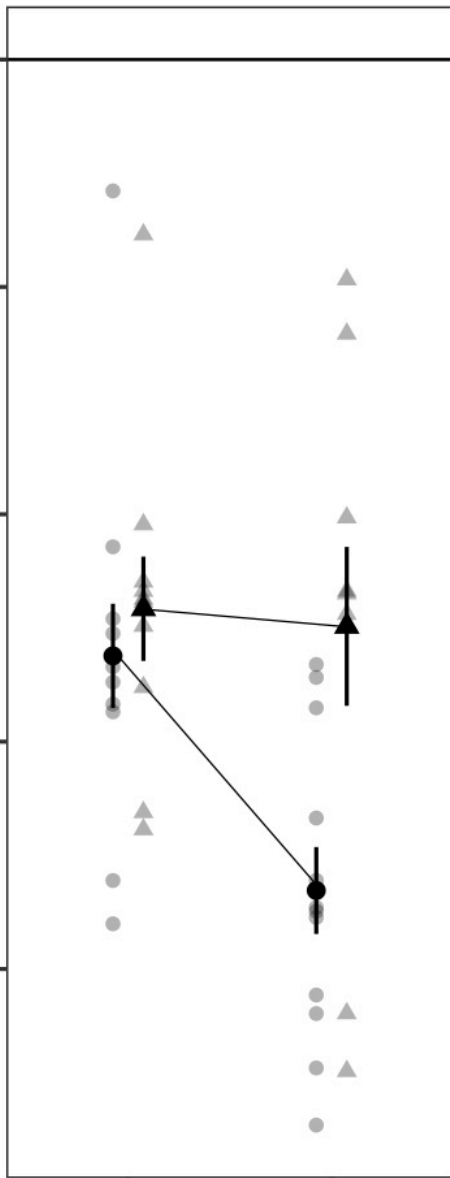

- No plasmid
- SBW25(pQBR103) no Hg
- SBW25(pQBR103) with Hg
- SBW25(pQBR57) no Hg
- SBW25(pQBR57) with Hg
- SBW25(pQBR103&pQBR57) no Hg
- SBW25(pQBR103&pQBR57) with Hg

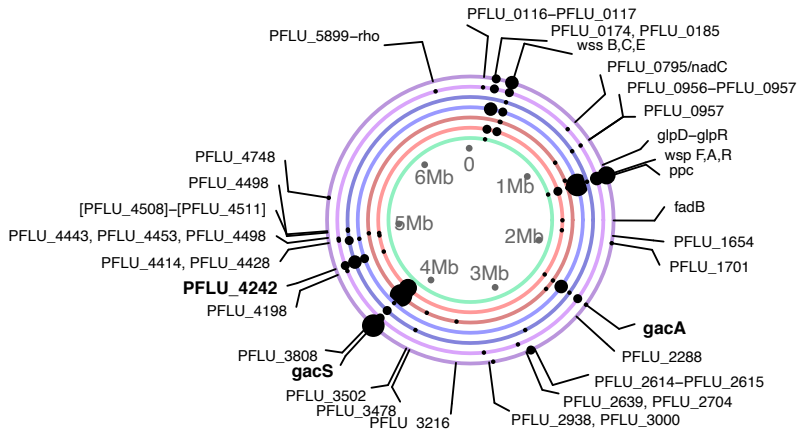

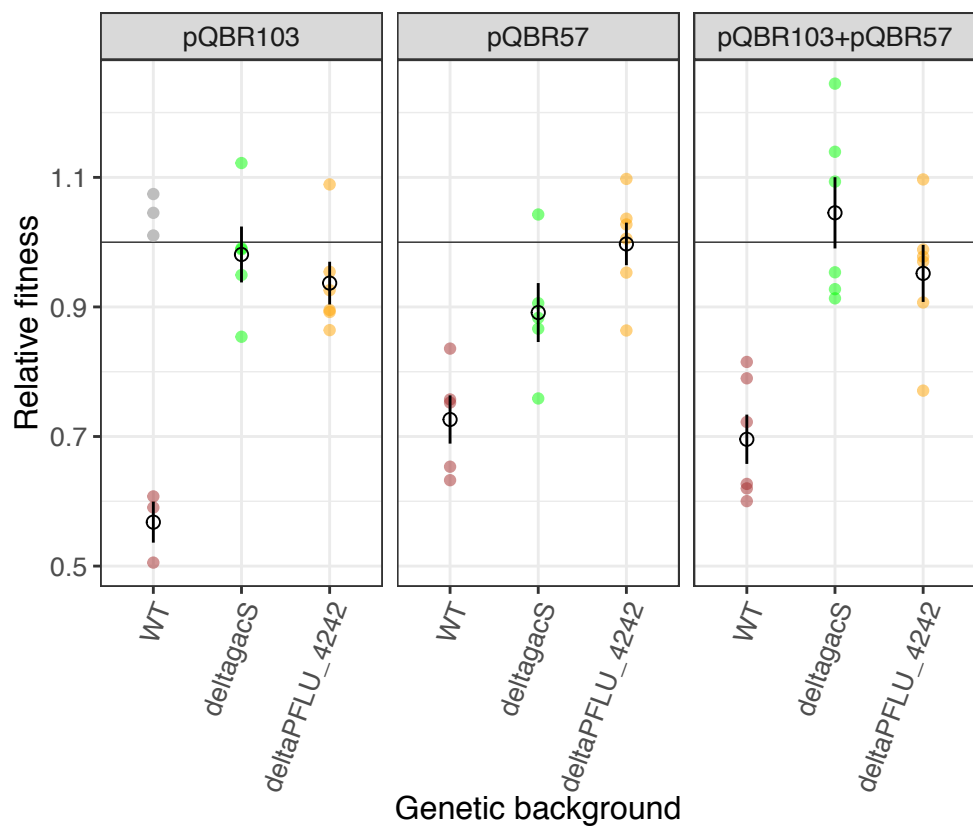

Source: http://biorxiv.org/content/10.1101/2020.09.29.318741v1.full.pdf
